# Supplementary material
Source: Springer Nature journal article supplement (https://www.springermedizin.de/resource/supplementary/12889_2011_3851_MOESM1_ESM.pdf/9491204)
Supplement: MOESM1 [file 9491204]

**Intervention and resource allocation**

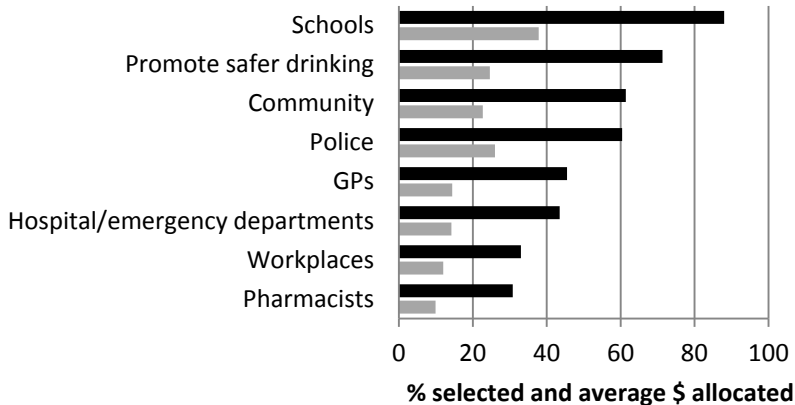

- Percentage of community who selected this intervention
- Average amount allocated when selected (\$'00)
